# Supplementary material
Source: PubMed Central journal article supplement (PMC7476400)
Supplement: Supp_Fig1.pdf [file Supp_Fig1.pdf]

## Supplementary Data

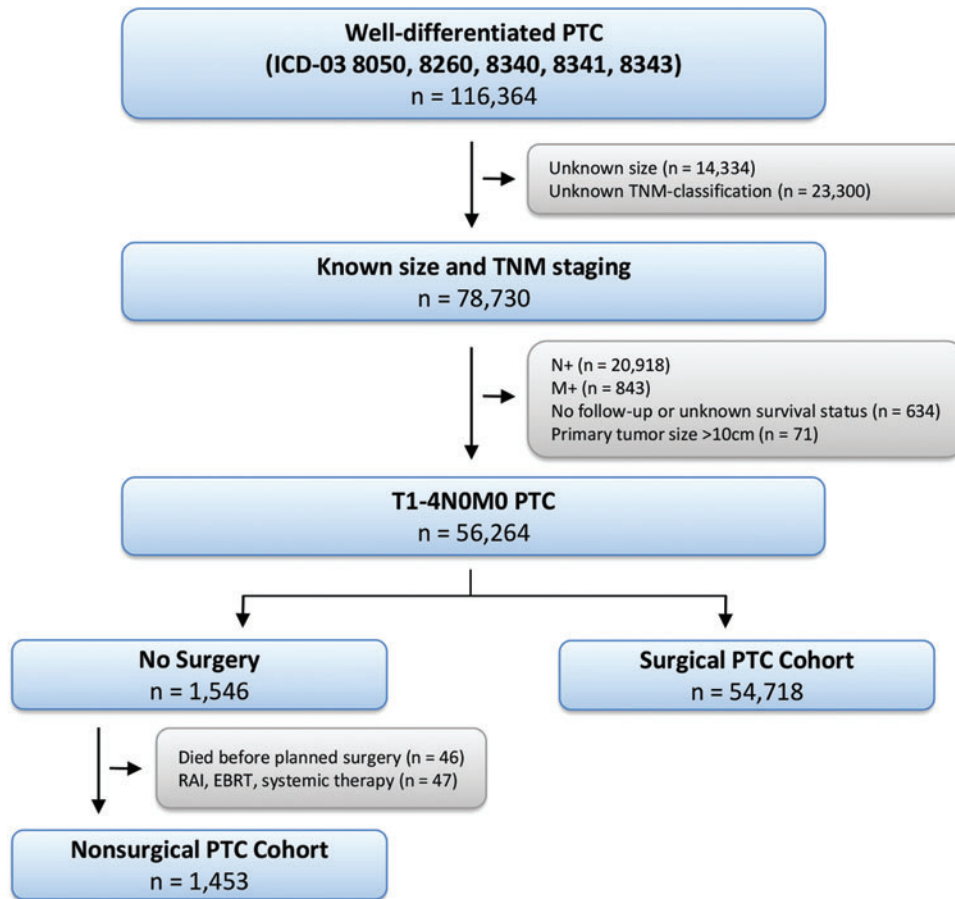

**SUPPLEMENTARY FIG. S1.** Consolidated Standards of Reporting Trials (CONSORT) diagram detailing the study inclusion criteria. Extrathyroidal extension based on radiological or pathological reporting. TNM classification based on the American Joint Committee on Cancer 8th Edition. EBRT, external beam radiation therapy; PTC, papillary thyroid carcinoma; RAI, radioactive iodine.
