# Supplementary material
Source: PubMed Central journal article supplement (PMC7476400)
Supplement: Supp_Fig2.pdf [file Supp_Fig2.pdf]

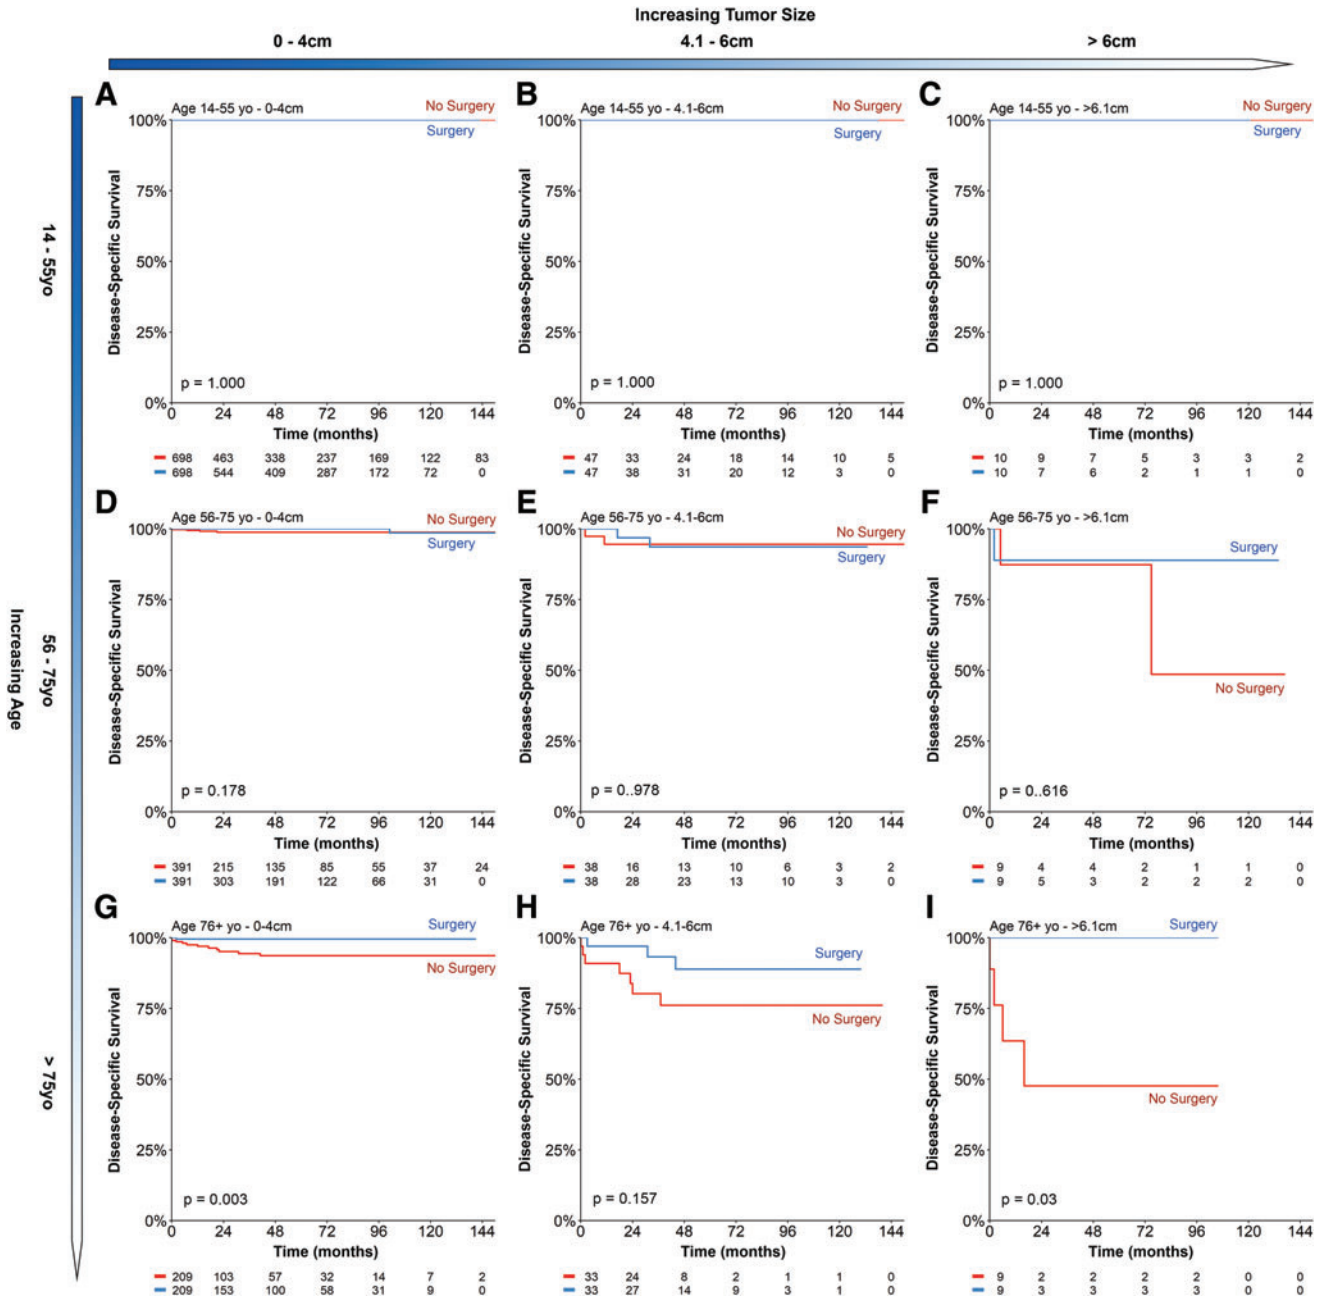

**SUPPLEMENTARY FIG. S2.** Propensity score matching subgroup analysis of disease-specific survival comparing surgery with no-surgery cohorts, with progressive size and increasing age. (A). Age 14–55 years, tumor size 0–4 cm. (B). Age 14–55 years, tumor size 4.1–6 cm. (C). Age 14–55 years, tumor size >6 cm. (D). Age 56–75 years, tumor size 0–4 cm. (E). Age 56–75 years, tumor size 4.1–6 cm. (F). Age 56–75 years, tumor size >6 cm. (G). Age >75 years, tumor size 0–4 cm. (H). Age >75 years, size 4.1–6 cm. (I). Age >75 years, tumor size >6 cm.
